## Expression of Concern

# Expression of Concern: Fingolimod inhibits proliferation and epithelial–mesenchymal transition in sacral chordoma by inactivating IL-6/STAT3 signaling

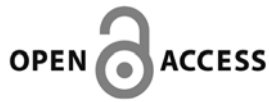

The Editorial Office has been made aware of potential issues surrounding the scientific validity of this paper, hence has issued an expression of concern to notify readers whilst the Editorial Office investigates.

Version of Record published:  
24 June 2020
